# Supplementary material for: A fluorescence-based method for the characterization of amino loading density on the flat surface of functionalized glass tubes
Source: Royal Society of Chemistry journal article supplement (doi:10.1039/c1ay05311f), 2011-01-01
Supplement: c1ay05311f.pdf [file c1ay05311f.pdf]

## Supplementary information for

### “A fluorescence-based method for the characterization of amino loading density on the flat surface of functionalized glass tubes”

#410 IT: 8.753 ST: 1.08 CS: 1 AMW: 670.45 NL: 1.77E7  
F: FTMS + c ESI Full ms [400.00-1000.00]

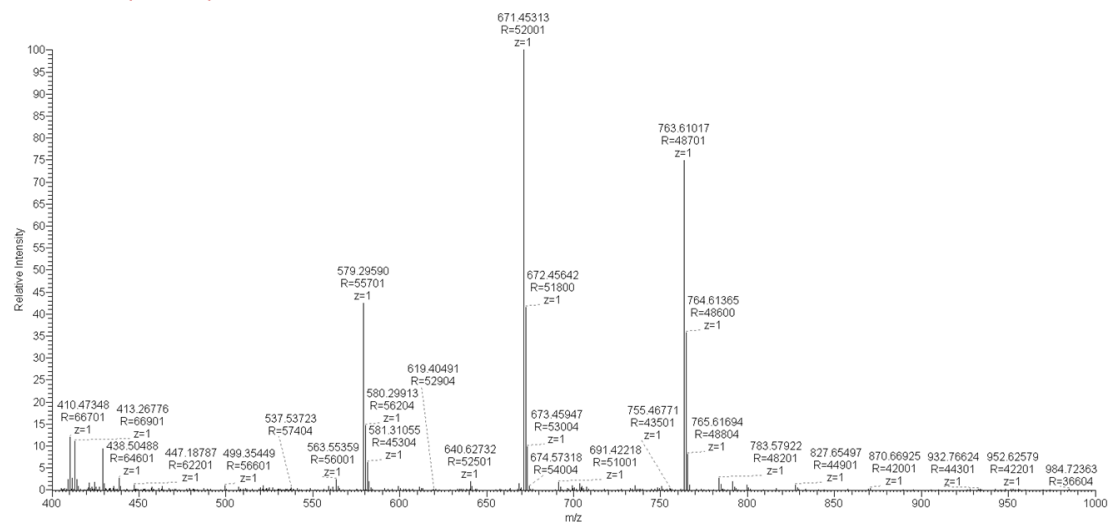

**Figure S1** HRMS of released molecules from fluorescent-labeled glass tubes. ESI mode.

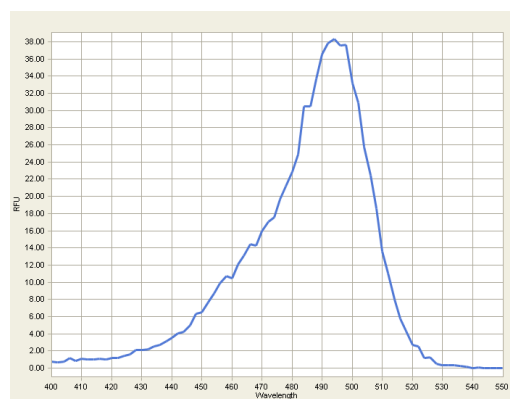

**Compound 2a**

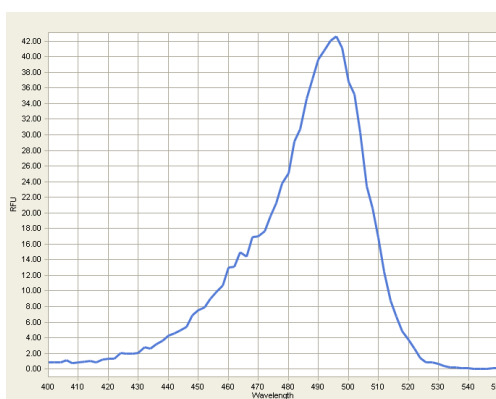

**Compound 2b**

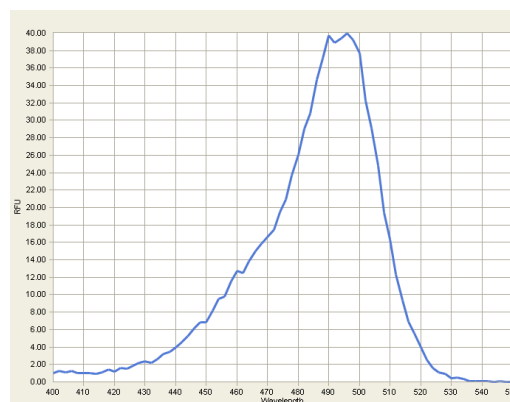

**Compound 2c**

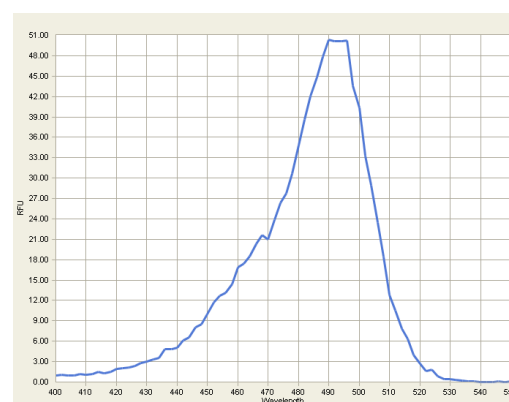

**Compound 3**

**Figure S2** Excitation spectra of the fluorescent molecules **2a**, **2b**, **2c** and **3** ( $\lambda_{em} = 600$  nm)

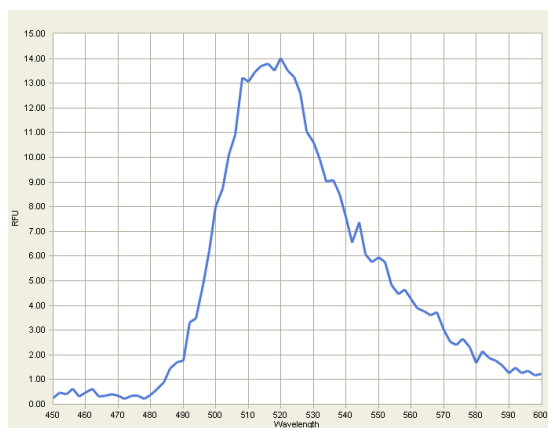

Compound 2a

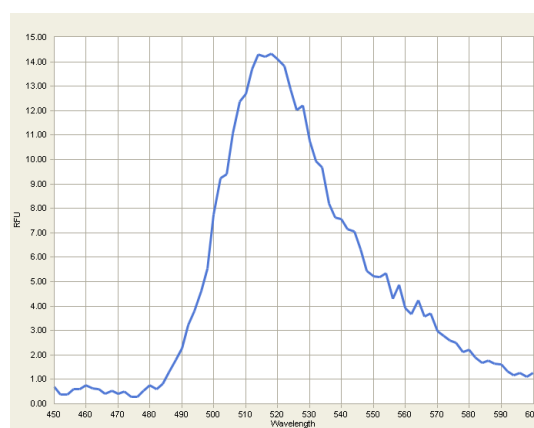

Compound 2b

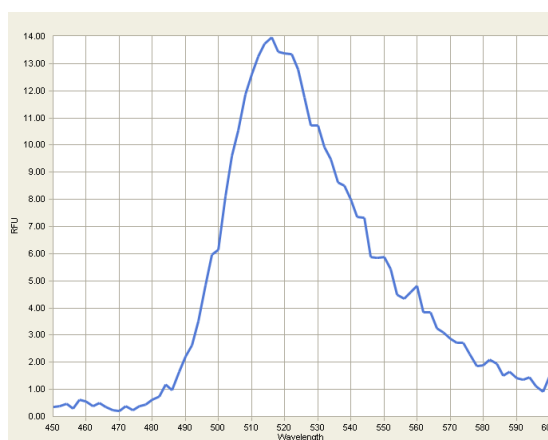

Compound 2c

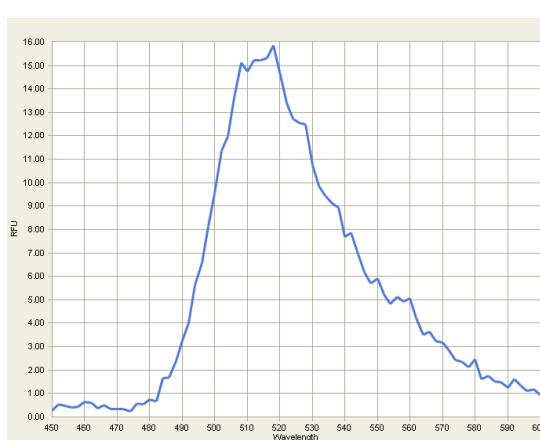

Compound 3

**Figure S3** Emission spectra of the fluorescent molecules **2a**, **2b**, **2c** and **3** ( $\lambda_{\text{ex}} = 400 \text{ nm}$ )
